# Supplementary material for: Prolonged ex-vivo normothermic kidney perfusion: The impact of perfusate composition
Source: PubMed Central journal article supplement (PMC8130974; doi:10.1371/journal.pone.0251595), 2021-05-18
Supplement: pone.0251595.s001.pdf [file pone.0251595.s001.pdf]

**S1 Fig. Histology 4 perfusate groups**

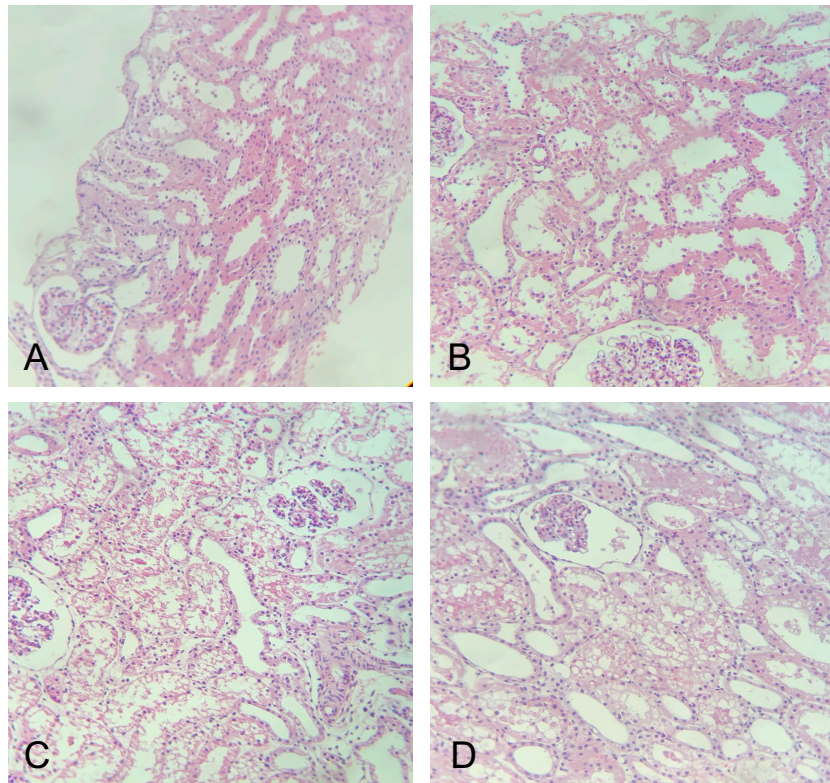

**Fig 1. Histology (HE stained) group 1. t = 0 biopsy (A&B) and t = 420 (C&D).**

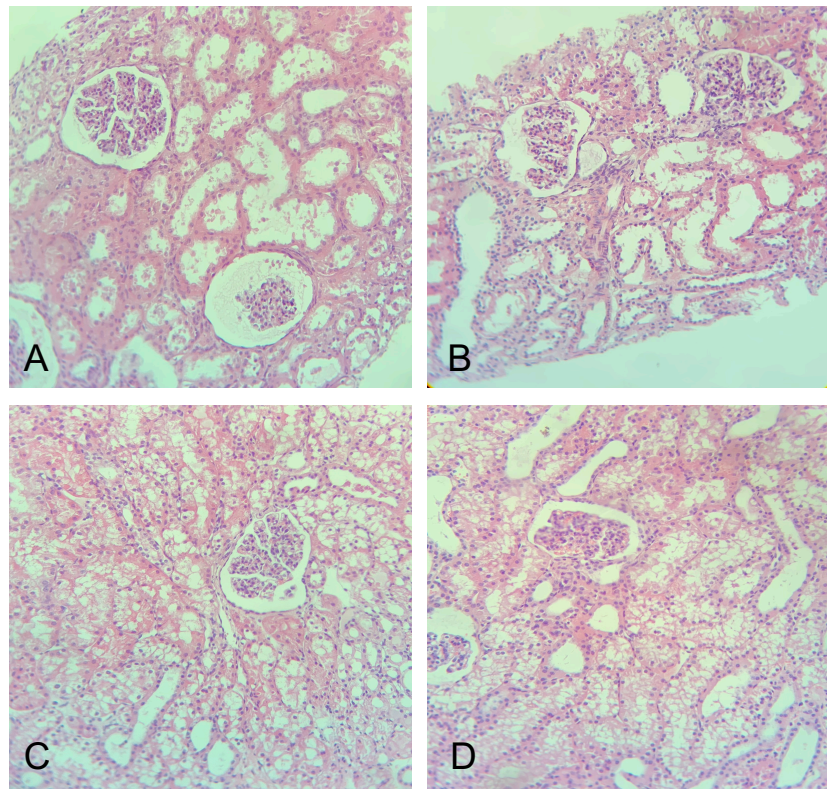

**Fig 2. Histology (HE stained) group 2. t = 0 biopsy (A&B) and t = 420 (C&D).**

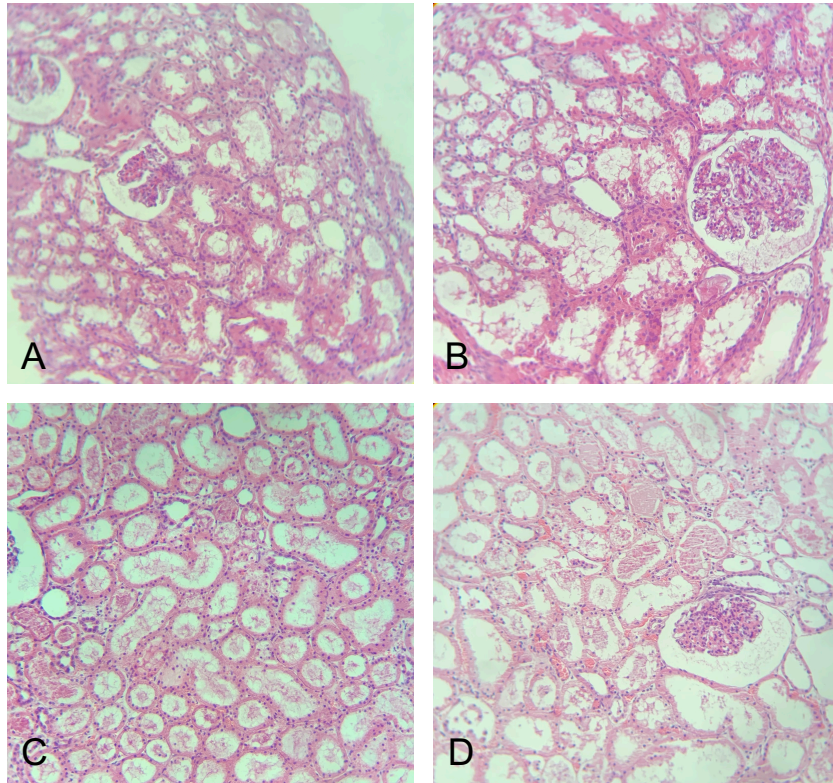

**Fig 3. Histology (HE stained) group 3.  $t = 0$  biopsy (A&B) and  $t = 420$  (C&D).**

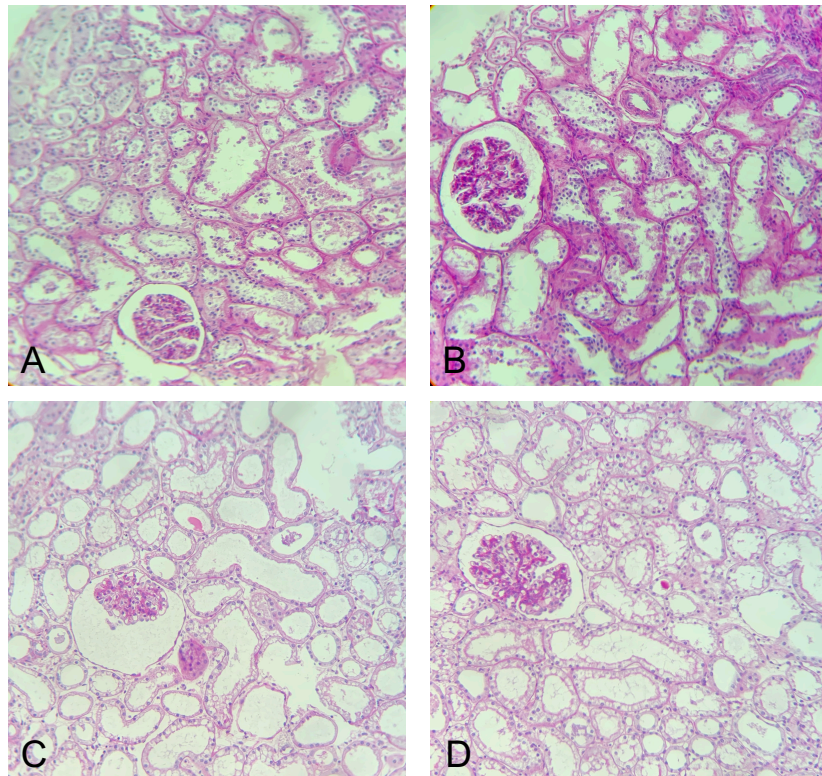

**Fig 4. Histology (HE stained) group 4.  $T = 0$  biopsy (A&B) and  $T = 420$  (C&D).**
