# Supplementary material for: Prolonged ex-vivo normothermic kidney perfusion: The impact of perfusate composition
Source: PubMed Central journal article supplement (PMC8130974; doi:10.1371/journal.pone.0251595), 2021-05-18
Supplement: pone.0251595.s003.pdf [file pone.0251595.s003.pdf]

| Experiment | Flow (ml/min) | t (min) | Bloodgas     |       |            |           |              | Perfusate |                |              |
|------------|---------------|---------|--------------|-------|------------|-----------|--------------|-----------|----------------|--------------|
|            |               |         | Na+ (mmol/L) | pH    | pCO2 (kPa) | pO2 (kPa) | Lac (mmol/L) | AST (U/L) | creat (umol/L) | Na+ (mmol/L) |
| <b>WME</b> | 554           | 0       | 145          | 7,05  | 6,62       | 72,30     | 6,7          | 33        | 394            | 149          |
| Group 1    | 955           | 60      |              |       |            |           |              | 42        | 390            | 149          |
|            | 670           | 120     |              |       |            |           |              | 64        | 391            | 154          |
|            | 446           | 180     |              |       |            |           |              | 98        | 377            | 157          |
|            | 330           | 240     | 156          | 7,282 | 6,11       | 71,80     | 5,6          | 137       | 373            | 164          |
|            | 231           | 300     |              |       |            |           |              | 165       | 350            | 161          |
|            | 125           | 360     |              |       |            |           |              | 183       | 358            | 163          |
|            | 78            | 420     | 156          | 7,233 | 6,50       | 65,40     | 7,5          | 211       | 375            | 163          |
| <b>WME</b> | 380           | 0       | 140          | 7,112 | 7,20       | >73,3     | 2,9          | 36        | 643            | 144          |
| Group 1    | 1000          | 60      |              |       |            |           |              | 57        | 395            | 150          |
|            | 800           | 120     |              |       |            |           |              | 67        | 281            | 158          |
|            | 420           | 180     |              |       |            |           |              | 79        | 245            | 161          |
|            | 250           | 240     | 159          | 7,384 | 7,09       | 57,40     | 1,5          | 83        | 233            | 166          |
|            | 215           | 300     |              |       |            |           |              | 99        | 215            | 167          |
|            | 185           | 360     |              |       |            |           |              | 104       | 198            | 169          |
|            | 165           | 420     | 162          | 7,427 | 6,53       | 59,60     | 2,5          | 128       | 181            | 170          |
| <b>WME</b> | 153           | 0       | 136          | 7,19  | 6,08       | >73,3     | 2,6          | 25        | 630            | 149          |
| Group 1    | 1070          | 60      |              |       |            |           |              | 51        | 474            | 149          |
|            | 994           | 120     |              |       |            |           |              | 86        | 436            | 152          |
|            | 920           | 180     |              |       |            |           |              | 134       | 416            | 156          |
|            | 655           | 240     | 152          | 7,294 | 7,40       | 65,20     | 1,6          | 174       | 388            | 158          |
|            | 490           | 300     |              |       |            |           |              | 236       | 382            | 161          |
|            | 290           | 360     |              |       |            |           |              | 285       | 359            | 159          |
|            | 222           | 420     | 153          | 7,323 | 6,42       | 65,70     | 3,4          | 380       | 353            | 159          |
| <b>WME</b> | 523           | 0       | 145          | 7,198 | 6,75       | >73,3     | 1,6          | 21        | 624            | 145          |
| Group 1    | 1287          | 60      |              |       |            |           |              | 43        | 402            | 152          |
|            | 1305          | 120     |              |       |            |           |              | 52        | 290            | 158          |
|            | 1182          | 180     |              |       |            |           |              | 61        | 227            | 160          |
|            | 916           | 240     | 160          | 7,402 | 6,95       | 62,60     | 2,9          | 64        | 184            | 163          |
|            | 699           | 300     |              |       |            |           |              | 71        | 175            | 165          |
|            | 422           | 360     |              |       |            |           |              | 73        | 178            | 169          |

|                  |      |     |     |       |      |       |     |     |      |     |
|------------------|------|-----|-----|-------|------|-------|-----|-----|------|-----|
|                  | 313  | 420 | 162 | 7,432 | 6,87 | 66,30 | 2,8 | 73  | 172  | 167 |
| <b>WME</b>       | 200  | 0   | 140 | 7,06  | 9,61 | >73,3 | 1,3 | 34  | 712  | 145 |
| Group 1          | 1095 | 60  |     |       |      |       |     | 69  | 372  | 150 |
|                  | 1055 | 120 |     |       |      |       |     | 87  | 347  | 153 |
|                  | 1019 | 180 |     |       |      |       |     | 111 | 333  | 158 |
|                  | 727  | 240 | 152 | 7,413 | 6,28 | >73,3 | 3,1 | 131 | 309  | 157 |
|                  | 545  | 300 |     |       |      |       |     | 129 | 250  | 162 |
|                  | 476  | 360 |     |       |      |       |     | 161 | 246  | 165 |
|                  | 370  | 420 | 153 | 7,434 | 6,36 | >73,3 | 3,2 | 166 | 248  | 162 |
| <b>Groningen</b> | 217  | 0   | 125 | 7,237 | 7,02 | 88,90 | 2,1 | 30  | 696  | 137 |
| Group 2          | 849  | 60  |     |       |      |       |     | 55  | 460  | 143 |
|                  | 790  | 120 |     |       |      |       |     | 77  | 395  | 139 |
|                  | 660  | 180 |     |       |      |       |     | 95  | 455  | 150 |
|                  | 513  | 240 | 140 | 7,498 | 5,64 | 52,70 | 2,5 | 107 | 452  | 147 |
|                  | 523  | 300 |     |       |      |       |     | 134 | 476  | 151 |
|                  | 451  | 360 |     |       |      |       |     | 152 | 489  | 150 |
|                  | 402  | 420 | 145 | 7,329 | 9,52 | 73,20 | 3,2 | 175 | 497  | 155 |
| <b>Groningen</b> | 560  | 0   | 132 | 7,285 | 7,16 | 59,30 | 2,2 | 20  | 904  | 156 |
| Group 2          | 1013 | 60  |     |       |      |       |     | 59  | 646  | 172 |
|                  | 1070 | 120 |     |       |      |       |     | 65  | 450  | 140 |
|                  | 815  | 180 |     |       |      |       |     | 77  | 468  | 141 |
|                  | 490  | 240 | 138 | 7,479 | 6,23 | 61,50 | 2,6 | 86  | 498  | 144 |
|                  | 333  | 300 |     |       |      |       |     | 95  | 500  | 143 |
|                  | 205  | 360 |     |       |      |       |     | 106 | 530  | 145 |
|                  | 126  | 420 | 137 | 7,285 | 9,45 | 71,90 | 7,1 | 125 | 542  | 144 |
| <b>Groningen</b> | 165  | 0   | 137 | 7,306 | 7,01 | 87,10 | 1,7 | 14  | 1141 | 186 |
| Group 2          | 990  | 60  |     |       |      |       |     | 40  | 441  | 142 |
|                  | 930  | 120 |     |       |      |       |     | 64  | 387  | 150 |
|                  | 403  | 180 |     |       |      |       |     | 72  | 433  | 148 |
|                  | 358  | 240 | 145 | 7,532 | 5,53 | 75,30 | 2,8 | 83  | 450  | 151 |
|                  | 361  | 300 |     |       |      |       |     | 111 | 572  | 186 |
|                  | 405  | 360 |     |       |      |       |     | 98  | 464  | 147 |
|                  | 444  | 420 | 148 | 7,521 | 5,72 | 65,10 | 4,3 | 113 | 508  | 162 |

|                  |     |     |       |       |      |       |      |     |      |     |
|------------------|-----|-----|-------|-------|------|-------|------|-----|------|-----|
| <b>Groningen</b> | 402 | 0   | 131   | 7,232 | 7,06 | 89,60 | 1,4  | 5   | 910  | 152 |
| Group 2          | 930 | 60  |       |       |      |       |      | 41  | 358  | 151 |
|                  | 940 | 120 |       |       |      |       |      | 127 | 303  | 174 |
|                  | 922 | 180 |       |       |      |       |      | 136 | 313  | 163 |
|                  | 560 | 240 | 147,0 | 7,550 | 5,41 | 76,10 | 2,7  | 149 | 384  | 174 |
|                  | 315 | 300 |       |       |      |       |      | 134 | 369  | 151 |
|                  | 182 | 360 |       |       |      |       |      | 148 | 393  | 157 |
|                  | 110 | 420 | 149   | 7,505 | 5,96 | 75,40 | 3,5  | 161 | 413  | 155 |
| <b>Groningen</b> | 212 | 0   | 140   | 7,385 | 7,37 | 86,70 | 1,6  | 41  | 819  | 150 |
| Group 2          | 879 | 60  |       |       |      |       |      | 36  | 607  | 145 |
|                  | 402 | 120 |       |       |      |       |      | 40  | 568  | 144 |
|                  | 270 | 180 |       |       |      |       |      | 45  | 558  | 145 |
|                  | 217 | 240 | 144   | 7,51  | 5,59 | 77,60 | 2,6  | 60  | 698  | 179 |
|                  | 202 | 300 |       |       |      |       |      | 63  | 603  | 152 |
|                  | 164 | 360 |       |       |      |       |      | 68  | 589  | 148 |
|                  | 112 | 420 | 148   | 7,455 | 5,97 | 76,10 | 4,5  | 78  | 603  | 152 |
| <b>Hosgood</b>   | 118 | 0   | 149   | 7,535 | 6,66 | 81,50 | 11,4 | 72  | 1050 | 132 |
| Group 3          | 182 | 60  |       |       |      |       |      | 101 | 1241 | 146 |
|                  | 127 | 120 |       |       |      |       |      | 152 | 852  | 139 |
|                  | 200 | 180 |       |       |      |       |      | 161 | 764  | 129 |
|                  | 224 | 240 | 155   | 7,647 | 5,17 | 74,10 | 10,4 | 194 | 548  | 116 |
|                  | 260 | 300 |       |       |      |       |      | 285 | 567  | 169 |
|                  | 296 | 360 |       |       |      |       |      | 252 | 376  | 153 |
|                  | 315 | 420 | 159   | 7,635 | 6,70 | 73,10 | 10,0 | 356 | 372  | 171 |
| <b>Hosgood</b>   | 133 | 0   | 167   | 7,611 | 6,68 | 65,80 | 13,0 | 10  | 1779 | 172 |
| Group 3          | 120 | 60  |       |       |      |       |      | 95  | 788  | 116 |
|                  | 41  | 120 |       |       |      |       |      | 136 | 698  | 129 |
|                  | 53  | 180 |       |       |      |       |      | 202 | 708  | 133 |
|                  | 88  | 240 | 139   | 7,336 | 4,73 | 55,30 |      | 256 | 610  | 150 |
|                  | 97  | 300 |       |       |      |       |      | 334 | 547  | 159 |
|                  | 126 | 360 |       |       |      |       |      | 506 | 466  | 150 |
|                  | 140 | 420 | 136   | 7,14  | 4,49 | 67,00 | 26,0 | 651 | 311  | 139 |
| <b>Hosgood</b>   | 82  | 0   | 154   | 7,59  | 6,57 | 78,20 | 12,4 | 10  | 1833 | 165 |

|                       |     |     |     |       |      |       |      |     |      |      |
|-----------------------|-----|-----|-----|-------|------|-------|------|-----|------|------|
| Group 3               | 76  | 60  |     |       |      |       |      | 70  | 1254 | 146  |
|                       | 61  | 120 |     |       |      |       |      | 67  | 836  | 106  |
|                       | 76  | 180 |     |       |      |       |      | 87  | 820  | 116  |
|                       | 78  | 240 | 141 | 7,453 | 4,80 | 54,00 | 20,0 | 129 | 853  | 141  |
|                       | 94  | 300 |     |       |      |       |      | 207 | 803  | 151  |
|                       | 92  | 360 |     |       |      |       |      | 407 | 768  | 168  |
|                       | 96  | 420 | 141 | 7,299 | 4,90 | 65,00 |      | 638 | 564  | 143  |
| <b>Hosgood</b>        | 72  | 0   | 165 | 7,708 | 6,31 | 66,70 | 13,0 | 5   | 1772 | 162  |
| Group 3               | 82  | 60  |     |       |      |       |      | 77  | 912  | 142  |
|                       | 48  | 120 |     |       |      |       |      | 94  | 662  | 150  |
|                       | 71  | 180 |     |       |      |       |      | 148 | 554  | 148  |
|                       | 68  | 240 | 146 | 7,468 | 4,53 | 64,60 | 22,0 | 235 | 438  | 146  |
|                       | 63  | 300 |     |       |      |       |      | 449 | 474  | >180 |
|                       | 84  | 360 |     |       |      |       |      | 583 | 331  | 154  |
|                       | 91  | 420 | 142 | 7,294 | 4,28 | 59,30 | 28,0 | 856 | 275  | 152  |
| <b>Hosgood</b>        | 155 | 0   | 167 | 7,502 | 9,06 | 95,00 | 13,1 | 6   | 1681 | 152  |
| Group 3               | 136 | 60  |     |       |      |       |      | 39  | 628  | 152  |
|                       | 126 | 120 |     |       |      |       |      | 53  | 418  | 123  |
|                       | 160 | 180 |     |       |      |       |      | 95  | 324  | 118  |
|                       | 179 | 240 | 136 | 7,213 | 4,52 | 74,60 | 23,0 | 119 | 202  | 109  |
|                       | 250 | 300 |     |       |      |       |      | 222 | 119  | 135  |
|                       | 260 | 360 |     |       |      |       |      | 478 | 138  | 142  |
|                       | 288 | 420 | 133 | 7,122 | 4,43 | 65,70 | 24,0 | 796 | 125  | 152  |
| <b>MEPEP/Weissenb</b> | 54  | 0   | 147 | 7,116 | 7,66 | 65,60 | 0,6  | 10  | 1148 | 159  |
| Group 4               | 271 | 60  |     |       |      |       |      | 62  | 711  | 155  |
|                       | 287 | 120 |     |       |      |       |      | 125 | 612  | 160  |
|                       | 306 | 180 |     |       |      |       |      | 339 | 603  | 165  |
|                       | 292 | 240 | 155 | 7,431 | 5,23 | 59,70 | 3,6  | 638 | 580  | 169  |
|                       | 297 | 300 |     |       |      |       |      | 882 | 593  | 172  |
|                       | 275 | 360 |     |       |      |       |      | 998 | 574  | 172  |
|                       | 242 | 420 | 156 | 7,459 | 5,44 | 68,80 | 3,7  | 937 | 564  | 168  |
| <b>MEPEP/Weissenb</b> | 150 | 0   | 138 | 7,079 | 6,65 | 83,50 | 3,4  | 61  | 825  | 167  |
| Group 4               | 853 | 60  |     |       |      |       |      | 135 | 423  | 159  |

|                       |     |     |     |       |      |       |     |     |      |     |
|-----------------------|-----|-----|-----|-------|------|-------|-----|-----|------|-----|
|                       | 973 | 120 |     |       |      |       |     | 225 | 428  | 163 |
|                       | 965 | 180 |     |       |      |       |     | 377 | 401  | 165 |
|                       | 818 | 240 | 151 | 7,402 | 5,82 | 58,70 | 3,8 | 603 | 420  | 165 |
|                       | 700 | 300 |     |       |      |       |     | 833 | 420  | 167 |
|                       | 601 | 360 |     |       |      |       |     | 958 | 429  | 173 |
|                       | 399 | 420 | 154 | 7,397 | 5,96 | 56,10 | 4,4 | 983 | 395  | 172 |
| <b>MEPEP/Weissenb</b> | 172 | 0   | 150 | 7,107 | 9,10 | 62,70 | 0,4 | 23  | 1123 | 158 |
| Group 4               | 648 | 60  |     |       |      |       |     | 52  | 598  | 155 |
|                       | 553 | 120 |     |       |      |       |     | 113 | 480  | 167 |
|                       | 509 | 180 |     |       |      |       |     | 153 | 488  | 175 |
|                       | 432 | 240 | 159 | 7,46  | 5,37 | 55,60 | 4,6 | 191 | 446  | 175 |
|                       | 388 | 300 |     |       |      |       |     | 228 | 433  | 177 |
|                       | 313 | 360 |     |       |      |       |     | 247 | 418  | 175 |
|                       | 257 | 420 | 162 | 7,505 | 5,49 | 69,40 | 4,5 | 264 | 432  | 179 |
| <b>MEPEP/Weissenb</b> | 111 | 0   | 149 | 7,206 | 6,62 | 78,90 | 0,8 | 9   | 1294 | 162 |
| Group 4               | 322 | 60  |     |       |      |       |     | 51  | 491  | 161 |
|                       | 283 | 120 |     |       |      |       |     | 100 | 412  | 163 |
|                       | 240 | 180 |     |       |      |       |     | 176 | 416  | 170 |
|                       | 202 | 240 | 155 | 7,393 | 5,96 | 68,40 | 3,4 | 215 | 410  | 171 |
|                       | 235 | 300 |     |       |      |       |     | 263 | 402  | 175 |
|                       | 218 | 360 |     |       |      |       |     | 296 | 397  | 174 |
|                       | 218 | 420 | 157 | 7,432 | 6,10 | 73,60 | 3,2 | 313 | 410  | 171 |
| <b>MEPEP/Weissenb</b> | 80  | 0   | 141 | 7,24  | 6,48 | 71,10 | 0,4 | 12  | 904  | 154 |
| Group 4               | 234 | 60  |     |       |      |       |     | 57  | 457  | 154 |
|                       | 202 | 120 |     |       |      |       |     | 81  | 453  | 156 |
|                       | 146 | 180 |     |       |      |       |     | 114 | 470  | 157 |
|                       | 144 | 240 | 142 | 7,291 | 5,91 | 60,80 | 5,1 | 166 | 458  | 158 |
|                       | 133 | 300 |     |       |      |       |     | 262 | 457  | 160 |
|                       | 119 | 360 |     |       |      |       |     | 379 | 427  | 151 |
|                       | 99  | 420 | 143 | 7,272 | 6,11 | 74,60 | 6,3 | 493 | 437  | 152 |

|           |       |       | Urine          |             |               |                |
|-----------|-------|-------|----------------|-------------|---------------|----------------|
| LDH (U/L) | TBARS | NAG   | Creat (mmol/L) | Na (mmol/L) | Diuresis (ml) | Weight (grams) |
| 135       | 11,76 | 1,32  |                |             | 0,0           | 307,39         |
| 247       | 6,79  |       | 1,4            | 129         | 11,0          |                |
| 360       | 6,79  | 3,86  | 4,0            | 74          | 4,5           |                |
| 469       | 7,25  | 6,23  | 4,7            | 58          | 6,0           |                |
| 568       | 6,96  | 9,92  | 2,6            | 102         | 8,0           |                |
| 615       | 8,36  | 12,77 | 0,8            | 151         | 29,0          |                |
| 613       | 8,15  | 14,47 | 0,5            | 162         | 27,0          |                |
| 631       | 8,70  | 17,77 | 0,4            | 166         | 22,5          | 427,64         |
| 119       | 8,46  | 1,11  |                |             | 0,0           | 284,87         |
| 246       | 5,96  | 1,93  | 1,8            | 118         | 42,5          |                |
| 319       | 5,15  | 2,76  | 2,2            | 53          | 52,5          |                |
| 420       | 6,17  | 3,03  | 1,5            | 102         | 27,5          |                |
| 441       | 5,71  | 4,01  | 0,8            | 143         | 25,0          |                |
| 535       | 6,18  | 4,09  | 0,5            | 139         | 39,0          |                |
| 483       | 5,53  | 5,93  | 0,4            | 147         | 50,0          |                |
| 510       | 5,93  | 8,80  | 0,4            | 150         | 79,0          | 452            |
| 185       | 6,59  | 1,70  |                |             | 0,0           | 267,79         |
| 223       | 5,27  | 1,71  | 0,5            | 144         | 60,0          |                |
| 308       | 4,06  | 3,12  | 1,0            | 127         | 27,5          |                |
| 348       | 5,16  | 4,88  | 0,8            | 135         | 43,0          |                |
| 407       | 6,48  | 6,74  | 0,6            | 148         | 35,0          |                |
| 437       | 5,34  | 9,68  | 0,4            | 154         | 33,0          |                |
| 468       | 5,48  | 11,75 | 0,4            | 159         | 27,0          | 82,16+         |
| 501       | 5,84  | 16,88 | 0,4            | 162         | 19,5          | 349,95         |
| 226       | 5,44  | 1,27  |                |             | 0,0           | 280,26         |
| 567       | 4,18  | 2,22  | 1,4            | 131         | 27,0          |                |
| 618       | 3,35  | 2,70  | 3,6            | 76          | 18,0          |                |
| 642       | 5,00  | 2,99  | 3,9            | 66          | 15,0          |                |
| 674       | 5,50  | 3,79  | 2,0            | 124         | 17,0          |                |
| 666       | 4,86  | 5,01  | 0,6            | 158         | 30,0          |                |
| 640       | 6,36  | 7,09  | 0,4            | 159         | 52,5          |                |

|     |      |       |     |     |       |        |
|-----|------|-------|-----|-----|-------|--------|
| 618 | 6,49 | 10,24 | 0,4 | 161 | 52,5  | 450,54 |
| 122 | 6,39 | 0,90  |     |     | 0,0   | 324,72 |
| 265 | 5,21 | 2,01  | 0,7 | 146 | 45,0  |        |
| 361 | 3,97 | 2,33  | 1,7 | 136 | 8,0   |        |
| 459 | 3,56 | 3,09  | 1,1 | 130 | 13,0  |        |
| 565 | 4,70 | 4,26  | 0,4 | 154 | 43,0  |        |
| 531 | 4,31 | 5,82  | 0,4 | 159 | 73,0  |        |
| 643 | 5,33 | 10,61 | 0,3 | 158 | 120,0 |        |
| 595 | 5,55 | 13,98 | 0,2 | 162 | 158,0 | 644,1  |
| 208 | 1,91 | 0,38  |     |     | 0,0   | 286,06 |
| 288 | 1,14 | 3,05  | 1,0 | 120 | 11,0  |        |
| 403 | 0,79 | 4,47  | 3,6 | 84  | 6,0   |        |
| 498 | 1,44 | 4,26  | 4,1 | 60  | 1,0   |        |
| 521 | 2,36 | 4,47  |     |     | 0,0   |        |
| 622 | 2,49 | 5,82  |     |     | 0,0   |        |
| 663 | 2,40 | 7,12  | 1,2 | 164 | 5,0   |        |
| 706 | 2,59 | 9,02  | 0,8 | 146 | 2,0   | 341,7  |
| 120 | 1,98 | 1,33  |     |     | 0,0   | 303,45 |
| 332 | 1,15 | 1,77  | 0,7 | 153 | 3,5   |        |
| 422 | 1,26 | 1,50  | 0,6 | 145 | 6,5   |        |
| 498 | 2,09 | 1,36  |     |     | 0,0   |        |
| 563 | 2,77 | 1,99  |     |     | 0,0   |        |
| 619 | 2,76 | 2,39  |     |     | 0,0   |        |
| 689 | 5,23 | 4,06  |     |     | 0,0   |        |
| 770 | 5,12 | 7,27  | 9,4 | 183 | 9,0   | 391,86 |
| 102 | 1,86 | 0,71  |     |     | 0,0   | 324,3  |
| 232 | 1,34 | 2,56  | 2,0 | 113 | 10,0  |        |
| 369 | 0,94 | 2,35  | 2,9 | 92  | 35,0  |        |
| 421 | 1,69 | 2,24  |     |     | 0,0   |        |
| 489 | 2,05 | 2,87  |     |     | 0,0   |        |
| 687 | 2,34 | 3,15  |     |     | 0,0   |        |
| 622 | 2,47 | 4,10  |     |     | 0,0   |        |
| 733 | 2,01 | 6,59  |     |     | 0,0   | 396,26 |

|     |      |       |     |     |       |        |
|-----|------|-------|-----|-----|-------|--------|
| 48  | 1,36 | 1,04  |     | 0,0 |       | 248,97 |
| 208 | 0,87 | 2,48  | 3,6 | 95  | 33,0  |        |
| 297 | 0,81 | 2,07  | 2,1 | 43  | 29,0  |        |
| 447 | 1,92 | 2,70  | 4,5 | 67  | 8,0   |        |
| 514 | 3,07 | 2,68  | 1,7 | 143 | 9,5   |        |
| 486 | 5,27 | 3,41  | 0,5 | 174 | 8,0   |        |
| 556 | 6,91 | 4,66  | 0,5 | 150 | 9,0   |        |
| 607 | 7,41 | 6,73  | 0,5 | 183 | 17,0  | 342,98 |
| 468 | 3,45 | 3,09  |     |     | 0,0   | 230,44 |
| 291 | 2,44 | 2,18  |     |     | 0,0   |        |
| 326 | 2,16 | 1,78  |     |     | 0,0   |        |
| 337 | 2,52 | 1,64  |     |     | 0,0   |        |
| 448 | 3,82 | 2,00  |     |     | 0,0   |        |
| 410 | 5,49 | 1,44  |     |     | 0,0   |        |
| 423 | 4,75 | 1,91  |     |     | 0,0   |        |
| 453 | 5,55 | 2,61  |     |     | 0,0   | 249,19 |
| 256 | 1,16 | 4,90  |     |     | 0,0   | 279,82 |
| 362 | 1,64 | 6,00  | 0,4 | 124 | 220,0 |        |
| 531 | 2,01 | 11,10 | 2,2 | 124 | 7,5   |        |
| 559 | 1,52 | 18,20 | 1,3 | 122 | 5,0   |        |
| 652 | 1,76 | 32,50 | 1,2 | 98  | 147,5 |        |
| 907 |      | 33,20 | 1,1 | 114 | 126,0 |        |
| 766 | 0,98 | 35,60 | 0,9 | 124 | 115,5 |        |
| 875 |      | 47,50 | 0,6 | 124 | 130,0 | 501,78 |
| 56  | 2,43 | 0,50  |     |     | 0,0   | 265,47 |
| 429 | 2,67 | 5,30  | 1,4 | 161 | 135,0 |        |
| 597 | 1,98 | 8,80  | 1,2 | 150 | 75,0  |        |
| 804 | 1,86 | 15,00 | 1,0 | 145 | 60,0  |        |
| 908 | 1,85 | 18,30 | 0,8 | 147 | 150,0 |        |
| 951 | 1,78 | 21,70 | 0,6 | 143 | 125,0 |        |
| 937 | 1,79 | 30,70 | 0,5 | 144 | 145,0 |        |
| 906 | 1,70 | 42,10 | 0,4 | 144 | 150,0 | 383,22 |
| 39  | 1,82 | 0,50  |     |     | 0,0   | 221,89 |



|      |      |       |     |     |       |        |
|------|------|-------|-----|-----|-------|--------|
| 333  | 2,36 | 2,60  | 1,7 | 158 | 12,5  |        |
| 346  | 2,27 | 3,80  | 1,6 | 151 | 52,5  |        |
| 432  | 2,40 | 5,80  | 1,4 | 148 | 60,0  |        |
| 540  | 1,92 | 7,80  | 1,1 | 145 | 92,0  |        |
| 613  | 2,42 | 11,00 | 1,0 | 151 | 100,0 |        |
| 788  | 2,77 | 17,90 | 0,8 | 150 | 109,5 |        |
| 785  | 1,97 | 33,20 | 0,6 | 151 | 100,0 | 370,3  |
| 18   | 2,44 | 0,70  |     |     | 0,0   | 282,3  |
| 434  | 1,42 | 3,80  | 1,5 | 157 | 175,0 |        |
| 522  | 1,44 | 5,30  | 1,2 | 137 | 100,0 |        |
| 704  | 1,13 | 9,10  | 0,9 | 135 | 125,0 |        |
| 829  | 1,24 | 15,50 | 0,7 | 139 | 150,0 |        |
| 940  | 1,94 | 15,80 | 0,5 | 143 | 100,0 |        |
| 922  | 1,97 | 21,60 | 0,5 | 143 | 125,0 |        |
| 1018 | 1,37 | 27,30 | 0,3 | 145 | 130,0 | 362    |
| 40   | 2,50 | 1,10  |     |     | 0,0   | 244,37 |
| 233  | 0,90 | 3,10  | 1,4 | 165 | 290,0 |        |
| 298  | 0,69 | 4,90  | 0,8 | 145 | 230,0 |        |
| 447  | 0,79 | 8,30  | 0,5 | 141 | 245,0 |        |
| 350  | 0,71 | 7,90  | 0,4 | 144 | 250,0 |        |
| 305  |      | 6,50  | 0,2 | 144 | 300,0 |        |
| 523  | 0,62 | 9,50  | 0,1 | 143 | 175,0 |        |
| 725  | 0,69 | 13,10 | 0,1 | 142 | 200,0 | 391,3  |
| 94   | 3,64 |       |     |     | 0,0   | 253,93 |
| 384  | 2,36 | 2,97  | 1,5 | 154 | 50,0  |        |
| 572  | 2,26 | 6,06  | 1,5 | 108 | 65,0  |        |
| 818  | 2,89 | 10,44 | 1,4 | 101 | 95,0  |        |
| 1049 | 4,95 | 16,53 | 1,3 | 103 | 100,0 |        |
| 1247 | 6,05 | 22,77 | 1,3 | 110 | 95,0  |        |
| 1412 | 7,76 | 29,29 | 1,2 | 127 | 100,0 |        |
| 1363 | 7,98 | 32,53 | 1,1 | 129 | 100,0 | 421,54 |
| 160  | 6,35 |       |     |     | 0,0   | 273,14 |
| 452  | 3,73 | 1,56  | 1   | 142 | 25,0  |        |

|      |       |       |     |     |      |        |
|------|-------|-------|-----|-----|------|--------|
| 685  | 3,76  | 6,17  | 1,3 | 109 | 35,0 |        |
| 882  | 4,87  | 14,19 | 1,3 | 102 | 47,0 |        |
| 975  | 6,09  | 29,60 | 1,1 | 97  | 22,5 |        |
| 1119 | 9,89  | 25,87 | 0,9 | 107 | 29,0 |        |
| 1284 | 11,29 | 24,09 | 1   | 118 | 18,0 |        |
| 1302 | 5,94  | 27,85 | 0,9 | 141 | 22,5 | 359,31 |
| 108  | 1,40  |       |     |     | 0,0  | 281,3  |
| 290  | 2,01  | 1,64  | 2   | 165 | 33,0 |        |
| 593  | 2,22  | 2,95  | 1,7 | 88  | 56,0 |        |
| 623  | 1,98  | 4,21  | 1,8 | 80  | 58,0 |        |
| 972  | 5,73  | 5,76  | 2   | 74  | 48,0 |        |
| 1064 | 6,13  | 7,70  | 2,1 | 92  | 50,0 |        |
| 1155 | 4,57  | 9,09  | 1,7 | 97  | 60,0 |        |
| 1220 | 9,80  | 11,79 | 1,5 | 112 | 66,0 | 439,84 |
| 67   | 4,28  | 1,84  |     |     | 0,0  | 293,97 |
| 241  | 3,08  | 1,69  | 2   | 148 | 80,0 |        |
| 378  | 2,74  | 4,33  | 2,4 | 90  | 77,0 |        |
| 558  | 3,60  | 5,69  | 2,2 | 77  | 53,0 |        |
| 681  | 4,61  | 6,85  | 2,4 | 81  | 50,0 |        |
| 797  | 4,37  | 8,29  | 1,9 | 95  | 65,0 |        |
| 869  | 7,09  | 8,90  | 1,6 | 112 | 80,0 |        |
| 855  | 7,80  | 9,52  | 1,5 | 124 | 60,0 | 433,56 |
| 75   | 3,81  |       |     |     | 0,0  | 349,63 |
| 279  | 4,28  | 1,57  | 1,5 | 154 | 5,0  |        |
| 414  | 3,52  | 2,15  | 0,9 | 140 | 17,0 |        |
| 473  | 2,87  | 4,31  | 0,9 | 130 | 8,0  |        |
| 554  | 11,09 | 6,81  | 0,9 | 131 | 6,0  |        |
| 653  | 13,31 | 10,08 | 0,8 | 136 | 10,0 |        |
| 724  | 14,06 | 15,76 | 0,7 | 139 | 10,0 |        |
| 808  | 11,86 | 21,59 | 0,7 | 148 | 7,0  | 466,68 |
